# Supplementary material
Source: Springer Nature journal article supplement (https://www.springermedizin.de/resource/supplementary/12889_2014_6762_MOESM1_ESM.pdf/9498884)
Supplement: MOESM1 [file 9498884]

All TB patients registered at 6 health facilities between December 2012 & March 2013

n=356

New smear positive and negative PTB

n=285

Recruited in the study

n=229

Sputum positive PTB

N=158

Extra-pulmonary TB n=38

Relapses n=33

Age <18 years n=28

Not accessed & incomplete data on age and sex n=28

Had no cough n=12

Sputum negative=59
